# Supplementary material for: The Specific Vulnerabilities of Cancer Cells to the Cold Atmospheric Plasma-Stimulated Solutions
Source: PubMed Central journal article supplement (PMC5493667; doi:10.1038/s41598-017-04770-x), 2017-06-30
Supplement: 41598_2017_4770_MOESM1_ESM.pdf [file 41598_2017_4770_MOESM1_ESM.pdf]

# **The Specific Vulnerabilities of Cancer Cells to the Cold Atmospheric Plasma- Stimulated Solutions**

Dayun Yan<sup>1\*</sup>, Haitao Cui<sup>1</sup>, Wei Zhu<sup>1</sup>, Niki Nourmohammadi<sup>2</sup>, Julian Milberg<sup>3</sup>, Lijie G. Zhang<sup>1</sup>, Jonathan H. Sherman<sup>4</sup>, Michael Keidar<sup>1\*</sup>.

<sup>1</sup>Department of Mechanical and Aerospace Engineering, The George Washington University, Science & Engineering Hall, 800 22<sup>nd</sup> Street, NW, Room 3550, Washington, DC 20052, USA

<sup>2</sup>Department of Epidemiology, Columbia University, Mailman School of Public Health, 722 West 168<sup>th</sup> Street, New York, NY 10032, USA

<sup>3</sup>Department of Biomedical Engineering, University of Miami, 1251 Memorial Drive McArthur Engineering Building, Coral Gables, FL, 33146-0621, USA

<sup>4</sup>Neurological Surgery, The George Washington University, Foggy Bottom South Pavilion, 22<sup>nd</sup> Street, NW, 7<sup>th</sup> Floor, Washington, DC 20037, USA

\*Corresponding authors: Dr. Dayun Yan: [ydy2012@gwmail.gwu.edu](mailto:ydy2012@gwmail.gwu.edu),

Dr. Michael Keidar: [keidar@gwu.edu](mailto:keidar@gwu.edu).

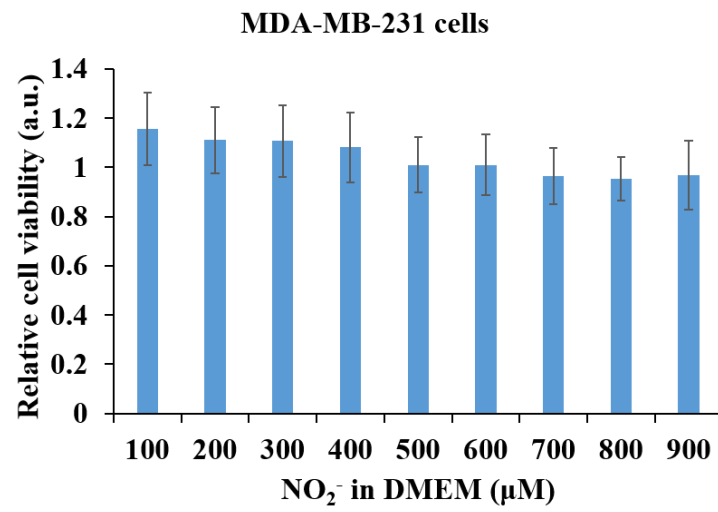

**Fig. S1. The toxicity of NO<sub>2</sub><sup>-</sup> on MDA-MB-231 cells.** Results are presented as the mean ± s.d. of three independently repeated experiments performed in sextuplicate.
